# Supplementary material
Source: PubMed Central journal article supplement (PMC5502533)
Supplement: NIHMS868496-supplement-Supp_Info.pdf [file NIHMS868496-supplement-Supp_Info.pdf]

# Transition State Structure of RNA Depurination by Saporin L3

Hongling Yuan, Christopher F. Stratton and Vern L. Schramm\*

Department of Biochemistry, Albert Einstein College of Medicine, 1300 Morris Park Avenue, Bronx, New York 10461

## SUPPORTING INFORMATION

### Synthesis of [7-<sup>15</sup>N]- and [9-<sup>15</sup>N]adenines.

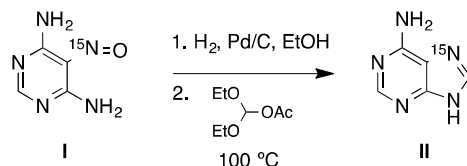

Supplementary Figure S1. Synthesis of [7-<sup>15</sup>N]adenine (II).

**[7-<sup>15</sup>N]Adenine (II).** [7-<sup>15</sup>N]adenine (II) was synthesized from 4,6-diamino-5-[<sup>15</sup>N]nitrosopyrimidine (I) using methods adapted from Sethi *et al.*<sup>52</sup> In a flame-dried, Ar-flushed flask equipped with magnetic stir bar and septum, nitrosopyrimidine (I) (20.0 mg, 0.144 mmol) was suspended in absolute EtOH (16.0 mL). A spatula tip of Pd on carbon (10 wt. %) was added to the suspension and the flask was purged with H<sub>2</sub> for 20 minutes. The flask was fitted with a balloon of H<sub>2</sub> and the suspension was stirred overnight at room temperature. The next day, the suspension was filtered through a pad of celite (EtOH) and the filtrate was concentrated to dryness by rotary evaporation. The crude product was suspended in diethoxymethyl acetate (2.5 mL) and stirred at 100 °C overnight in a sealed, thick-walled flask. The next morning, the reaction was cooled to room temperature and concentrated by rotary evaporation. The crude product was purified via HPLC on a Phenomenex Luna<sup>®</sup> 5 μm C<sub>18</sub> column (250 x 10.0 mm, 100 Å) using an isocratic solvent system of 4% MeCN in H<sub>2</sub>O. Fractions containing [7-<sup>15</sup>N]adenine were combined, frozen, and the solvent was removed via lyophilization to provide (II) as a white solid. Analytical data were in agreement with literature precedent.

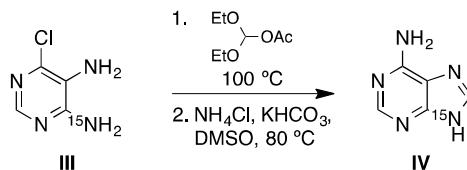

Supplementary Figure S2. Synthesis of [9-<sup>15</sup>N]adenine (IV).

**[9-<sup>15</sup>N]Adenine (IV).** [9-<sup>15</sup>N]Adenine (IV) was synthesized from [4-<sup>15</sup>N]diamino-6-chloropyrimidine (III) using methods adapted from Sethi *et al.*<sup>52</sup> and Jones *et al.*<sup>53</sup> In a flame-dried, Ar-flushed thick-walled flask, chloropyrimidine (III) (10.0 mg, 0.0687 mmol) was dissolved in diethoxymethyl acetate (1.5 mL). The flask was sealed and the mixture was stirred at 100 °C overnight. The next day, the reaction was cooled to room temperature and concentrated to dryness by rotary evaporation. The crude product was dissolved in dry DMSO (2.0 mL) in a flame-dried, Ar-flushed 4.0 mL vial equipped with magnetic stir bar and septum. KHCO<sub>3</sub> (41.2 mg, 0.412 mmol) and NH<sub>4</sub>Cl (14.6 mg, 0.274 mmol) were added to the solution, the vial was sealed with a Teflon cap, and the reaction was stirred at 80 °C for three days. The reaction was then cooled to room temperature, diluted with H<sub>2</sub>O, and filtered through a pad of celite (H<sub>2</sub>O). The crude product was purified via HPLC on a Phenomenex Luna<sup>®</sup> 5 μm C<sub>18</sub> column (250 x 10.0 mm, 100 Å) using an isocratic solvent system of 4% MeCN in H<sub>2</sub>O. Fractions containing [9-<sup>15</sup>N]adenine were combined, frozen, and solvent was removed via lyophilization to afford (IV) as a white solid. Analytical data were in agreement with literature precedent.

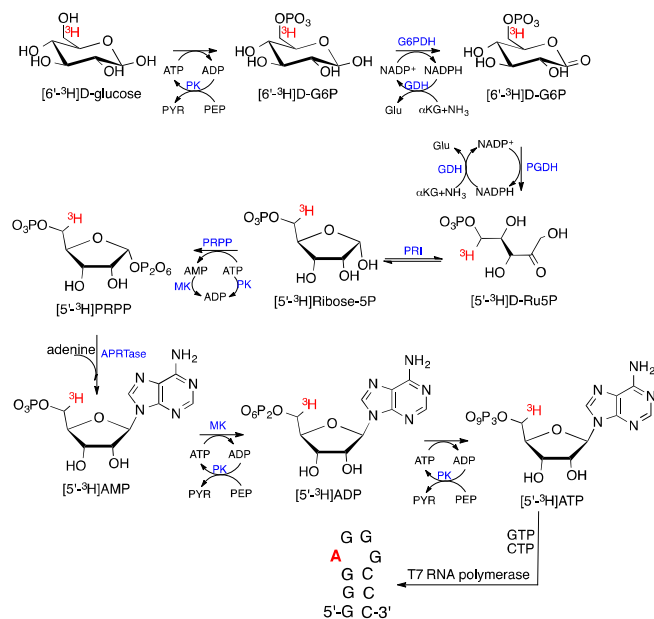

**Supplementary Figure S3.** Synthesis of isotopically labeled stem-loop RNAs.
